# Supplementary material
Source: HighWire-hosted journal article supplement (https://www.g3journal.org/content/suppl/2014/03/21/g3.114.010496)
Supplement: FigureS5.pdf [file FigureS5.pdf]

>attP-FRT-RFP

CGCGCTCGCGGACTGACGGTCGTAAGCACCCGCGTACGTGTCCACCCCGGTCACAACCCCTTGTGTATGTCGGCGGCCCTACGCC  
CCAAGTGAAGAACTCAAAGTTACCCAGTTGGGGCACTACTCCCGAAAACCGCTTCTGACCTGGGAAAACGTGAAGCCCCGGGC  
ATCCGCTGAGGGTTGCCCGGGGGCTTCGGTGTGTCAGTACGAAGTTCCTATTCTCTAGAAAAGTATAGGAACTTCGGATCTAATT  
CAATTAGAGACTAATTCAATTAGAGCTAATTCAATTAGGATCCAAGCTTATCGATTTTCGAACCCCTCGACCGCCGGAGTATAAATAGAG  
GCGCTTCGTCTACGGAGCGACAATTCAATTCAAACAAGCAAAGTGAACACGTCGCTAAGCGAAAAGCTAAGCAAATAAACAAGCGCAG  
CTGAACAAGCTAAACAATCGGGACTAGAGCCGGTCGCCACCATGAGGTCTTCCAAGAATGTTATCAAGGAGTTCATGAGGTTTAAGGT  
TCGCATGGAAGGAACGGTCAATGGGCACGAGTTTGAATAGAAAGGCGAAGGAGAGGGGAGGCCATACGAAGGCCACAATACCGTAA  
AGCTTAAGGTAACCAAGGGGGGACCTTTGCCATTTGCTTGGGATATTTTGTACCACAATTTTCAGTATGGAAGCAAGGTATATGTCAA  
GCACCCTGCCGACATAACCAGACTATAAAAAGCTGTCAATTCCTGAAGGATTTAAATGGGAAAGGGTCATGAACTTTGAAGACGGTGGC  
GTCGTTACTGTAACCCAGGATTCAGTTTGCAGGATGGCTGTTTCATCTACAAGGTCAAGTTCATTGGCGTGAACCTTCCTTCCGATGG  
ACCTGTTATGCAAAAAGAAGACAATGGGCTGGGAAGCCAGCACTGAGCGTTTGTATCCTCGTGATGGCGTGTGAAAGGAGAGATTCA  
TAAGGCTCTGAAGCTGAAAGACGGTGGTCAATTACCTAGTTGAATTCAAAAGTATTTACATGGCAAAGAAGCCTGTGCAGCTACCAGG  
GTACTACTATGTTGACTCCAAACTGGATATAACAAGCCACAACGAAGACTATAACAATCGTTGAGCAGTATGAAAGAACCGAGGGACG  
CCACCATCTGTTCCTTTAGCGGCCATCGAATTCGAGCTCGCCACTAAGCGTCGCGCCACTTCAACGCTCGATGGGAGCGTCATTGGTG  
GGCGGGTAACCGTCGAAATCAGTGTTCACGCTTCCAATCGCAACAAAAAATTCCTGCAACACTGAAAAGCATAACGAAAACGATGA  
AGATTGTACGAGAAACCATAAAGTATTTTATCCACAAAGACACGTATAGCAGAAAAGCCAAGTAACTCGGCGATAAGTTGTGTACA  
CAAGAATAAAAATCGGCCAGATTCAGTGTGTCAGAAATAAGAAAACCCCACTATGTTTTCTTTGCCTTTTCTTTCTCCAGCGATCAT  
TCATTCGTGGTGAAAGAACGGGGTCATTGCACGGAGTTTCGACTGCGGAAAGCAGAGCTGCCGTTCACTTCGTCTATAATTAGCGC  
TTTCTATTTTCCCGATTTCGGGCCGCTGCTGCGCTTTCCGCCTGCTGTTTGTGGCAAGTGTAGCAGCAGGCTGTGCACGCAGTGTGGC  
ATGCACTTGGCTTTCCACCGTTGGTATCGATTCTCTGGGACGATGAGTCATTCCTTTCCGGGGCCACAGCATAATCGTTGCCAGCTCACC  
GAAATGGTGACTTCATTTCTTAACTGCCGTCAAGCATGCGATTGTACATACATATTTATATATGTACATATTTATGTGACTATGG  
TAGGTCGATATAATAGCAATCAACGCAAGCAAATGTGTCAGTCCTGCTTACAGGAACGATTCTATTTAGTAATTTTCGTTGTATAAAGT  
AATTATGTATGTATGTAAGCCCCATAAATCTGAAACAATTAGGCAAAACCATGCGAAGCT

**Figure S5** The DNA sequence of the attP-FRT-RFP cassette in our study. The attP sequence is highlighted in red and the FRT highlighted in green, and the RFP DNA sequence is shown as underlined.
